# Supplementary material for: Choosing what is left: the spatial structure of a wild herbivore population within a livestock-dominated landscape
Source: PeerJ. 2020 Apr 8;8:e8945. doi: 10.7717/peerj.8945 (PMC7150538; doi:10.7717/peerj.8945)
Supplement: Supplemental Information 5 [file peerj-08-8945-s005.xlsx]

## Sheet: II_Y_III_GUANACOS_2017_ALL_PV_0
Number of observation	Group size	x coordinate	y coordinate
1	13	4.40225e+06	5.27231e+06
2	11	4.40225e+06	5.27231e+06
3	21	4.40204e+06	5.27235e+06
4	6	4.40204e+06	5.27235e+06
5	11	4.40182e+06	5.27238e+06
6	10	4.40157e+06	5.27242e+06
7	51	4.40144e+06	5.27245e+06
8	14	4.40144e+06	5.27245e+06
9	6	4.4013e+06	5.27246e+06
10	1	4.4013e+06	5.27246e+06
11	5	4.4013e+06	5.27246e+06
12	41	4.40104e+06	5.27249e+06
13	7	4.40104e+06	5.27249e+06
14	1	4.40076e+06	5.27249e+06
15	4	4.40063e+06	5.27251e+06
16	2	4.40063e+06	5.27251e+06
17	5	4.40044e+06	5.27252e+06
18	25	4.40001e+06	5.27255e+06
19	2	4.40063e+06	5.27251e+06
20	1	4.40044e+06	5.27252e+06
21	2	4.40044e+06	5.27252e+06
22	1	4.40022e+06	5.27256e+06
23	2	4.4001e+06	5.27255e+06
24	2	4.40001e+06	5.27255e+06
25	9	4.39956e+06	5.27255e+06
26	1	4.39956e+06	5.27255e+06
27	5	4.39937e+06	5.27257e+06
28	1	4.39937e+06	5.27257e+06
29	4	4.39937e+06	5.27257e+06
30	3	4.39917e+06	5.27252e+06
31	1	4.39917e+06	5.27252e+06
32	3	4.39909e+06	5.27252e+06
33	2	4.39883e+06	5.27266e+06
34	9	4.39857e+06	5.27276e+06
35	1	4.39836e+06	5.27283e+06
36	4	4.40367e+06	5.28284e+06
37	3	4.40429e+06	5.28264e+06
38	8	4.40174e+06	5.28347e+06
39	4	4.40206e+06	5.26966e+06
40	5	4.4037e+06	5.28115e+06
41	2	4.40374e+06	5.28085e+06
42	7	4.40376e+06	5.28055e+06
43	8	4.40377e+06	5.28012e+06
44	10	4.40377e+06	5.28012e+06
45	4	4.40377e+06	5.28012e+06
46	5	4.4038e+06	5.27967e+06
47	4	4.40393e+06	5.27945e+06
48	4	4.40393e+06	5.27945e+06
49	6	4.40392e+06	5.27939e+06
50	2	4.40392e+06	5.27939e+06
51	5	4.40386e+06	5.2792e+06
52	6	4.40386e+06	5.2792e+06
53	2	4.40388e+06	5.27902e+06
54	8	4.40388e+06	5.27902e+06
55	1	4.4039e+06	5.2789e+06
56	4	4.40383e+06	5.27867e+06
57	4	4.40388e+06	5.27902e+06
58	14	4.40383e+06	5.27867e+06
59	5	4.40364e+06	5.27843e+06
60	8	4.40364e+06	5.27843e+06
61	4	4.40352e+06	5.27795e+06
62	1	4.40364e+06	5.27777e+06
63	14	4.40364e+06	5.27777e+06
64	3	4.40392e+06	5.27736e+06
65	1	4.40394e+06	5.27716e+06
66	9	4.40389e+06	5.27695e+06
67	22	4.40392e+06	5.27664e+06
68	6	4.40367e+06	5.2765e+06
69	4	4.40363e+06	5.2764e+06
70	1	4.40362e+06	5.27633e+06
71	10	4.40361e+06	5.27624e+06
72	22	4.40361e+06	5.27624e+06
73	1	4.4036e+06	5.27614e+06
74	10	4.4036e+06	5.27614e+06
75	13	4.4036e+06	5.27614e+06
76	34	4.40354e+06	5.27599e+06
77	2	4.4036e+06	5.27614e+06
78	7	4.40354e+06	5.27599e+06
79	7	4.40354e+06	5.27599e+06
80	8	4.40352e+06	5.27589e+06
81	5	4.40345e+06	5.27581e+06
82	1	4.40345e+06	5.27581e+06
83	84	4.40347e+06	5.27557e+06
84	5	4.40345e+06	5.2752e+06
85	1	4.40341e+06	5.27501e+06
86	4	4.40341e+06	5.27501e+06
87	15	4.42806e+06	5.32446e+06
88	5	4.42788e+06	5.32456e+06
89	11	4.42762e+06	5.32471e+06
90	19	4.42806e+06	5.32446e+06
91	19	4.42832e+06	5.32432e+06
92	6	4.42844e+06	5.32425e+06
93	5	4.42844e+06	5.32425e+06
94	1	4.42877e+06	5.32407e+06
95	2	4.42877e+06	5.32407e+06
96	7	4.42905e+06	5.32391e+06
97	9	4.42913e+06	5.32387e+06
98	5	4.42926e+06	5.32379e+06
99	16	4.43002e+06	5.32337e+06
100	17	4.43027e+06	5.32323e+06
101	12	4.43065e+06	5.32302e+06
102	3	4.43065e+06	5.32302e+06
103	20	4.43153e+06	5.32254e+06
104	1	4.43153e+06	5.32254e+06
105	10	4.432e+06	5.32228e+06
106	1	4.39915e+06	5.3249e+06
107	5	4.3992e+06	5.325e+06
108	12	4.39954e+06	5.32523e+06
109	4	4.4003e+06	5.32571e+06
110	10	4.40043e+06	5.32576e+06
111	1	4.40057e+06	5.3258e+06
112	14	4.40128e+06	5.32607e+06
113	11	4.40219e+06	5.32641e+06
114	1	4.40253e+06	5.32652e+06
115	8	4.40361e+06	5.32674e+06
116	1	4.4039e+06	5.32674e+06
117	9	4.40477e+06	5.3269e+06
118	7	4.40519e+06	5.32703e+06
119	3	4.4054e+06	5.32711e+06
120	7	4.4054e+06	5.32711e+06
121	4	4.40569e+06	5.32716e+06
122	14	4.40585e+06	5.32716e+06
123	7	4.40585e+06	5.32716e+06
124	1	4.40688e+06	5.32724e+06
125	17	4.40707e+06	5.32725e+06
126	6	4.40707e+06	5.32725e+06
127	3	4.40841e+06	5.32715e+06
128	11	4.40841e+06	5.32715e+06
129	6	4.40917e+06	5.32694e+06
130	7	4.42798e+06	5.3264e+06
131	3	4.42798e+06	5.3264e+06
132	14	4.42809e+06	5.32665e+06
133	5	4.42816e+06	5.32681e+06
134	7	4.42824e+06	5.32701e+06
135	6	4.4413e+06	5.32866e+06
136	1	4.44095e+06	5.32831e+06
137	5	4.44095e+06	5.32831e+06
138	1	4.44083e+06	5.32818e+06
139	4	4.44045e+06	5.32781e+06
140	1	4.4403e+06	5.32765e+06
141	6	4.43978e+06	5.32711e+06
142	5	4.43945e+06	5.32678e+06
143	35	4.43922e+06	5.32655e+06
144	1	4.43886e+06	5.32618e+06
145	2	4.43867e+06	5.32598e+06
146	3	4.43849e+06	5.32579e+06
147	1	4.43838e+06	5.32569e+06
148	1	4.43818e+06	5.32548e+06
149	3	4.43818e+06	5.32548e+06
150	5	4.438e+06	5.32529e+06
151	4	4.4379e+06	5.32519e+06
152	11	4.42599e+06	5.3219e+06
153	9	4.42583e+06	5.32153e+06
154	10	4.42575e+06	5.32136e+06
155	4	4.42563e+06	5.32109e+06
156	7	4.42544e+06	5.32066e+06
157	12	4.42525e+06	5.32021e+06
158	24	4.42525e+06	5.32021e+06
159	10	4.4252e+06	5.3201e+06
160	4	4.4252e+06	5.3201e+06
161	5	4.42511e+06	5.31991e+06
162	23	4.42495e+06	5.31955e+06
163	15	4.4248e+06	5.31922e+06
164	1	4.4248e+06	5.31922e+06
165	6	4.42469e+06	5.31896e+06
166	7	4.42465e+06	5.31887e+06
167	3	4.42459e+06	5.31873e+06
168	8	4.42436e+06	5.31821e+06
169	8	4.42425e+06	5.31797e+06
170	1	4.42424e+06	5.31793e+06
171	13	4.42412e+06	5.31766e+06
172	7	4.42396e+06	5.31731e+06
173	7	4.42372e+06	5.31682e+06
174	9	4.42366e+06	5.31671e+06
175	11	4.42344e+06	5.31627e+06
176	20	4.42333e+06	5.31605e+06
177	14	4.42325e+06	5.31589e+06
178	3	4.42313e+06	5.31566e+06
179	3	4.42302e+06	5.31544e+06
180	6	4.42203e+06	5.31349e+06
181	3	4.42192e+06	5.31325e+06
182	2	4.42192e+06	5.31325e+06
183	9	4.42171e+06	5.31284e+06
184	8	4.42085e+06	5.31114e+06
185	7	4.4218e+06	5.31302e+06
186	5	4.4216e+06	5.31263e+06
187	15	4.42156e+06	5.31254e+06
188	4	4.42156e+06	5.31254e+06
189	7	4.42136e+06	5.31217e+06
190	8	4.42124e+06	5.31192e+06
191	3	4.42119e+06	5.31181e+06
192	2	4.42111e+06	5.31167e+06
193	3	4.42111e+06	5.31167e+06
194	3	4.42098e+06	5.3114e+06
195	7	4.42098e+06	5.3114e+06
196	5	4.42085e+06	5.31114e+06
197	13	4.4207e+06	5.31085e+06
198	2	4.4207e+06	5.31085e+06
199	9	4.42063e+06	5.31071e+06
200	9	4.42063e+06	5.31071e+06
201	1	4.42063e+06	5.31071e+06
202	13	4.42057e+06	5.3106e+06
203	3	4.41819e+06	5.3095e+06
204	8	4.41806e+06	5.30936e+06
205	6	4.41806e+06	5.30936e+06
206	6	4.41763e+06	5.30891e+06
207	7	4.41763e+06	5.30891e+06
208	2	4.41763e+06	5.30891e+06
209	1	4.41752e+06	5.30879e+06
210	17	4.41736e+06	5.30863e+06
211	1	4.4172e+06	5.30846e+06
212	5	4.41703e+06	5.30828e+06
213	8	4.41703e+06	5.30828e+06
214	19	4.41686e+06	5.3081e+06
215	4	4.41686e+06	5.3081e+06
216	7	4.41686e+06	5.3081e+06
217	1	4.41686e+06	5.3081e+06
218	6	4.4167e+06	5.30792e+06
219	8	4.41637e+06	5.30753e+06
220	5	4.41637e+06	5.30753e+06
221	1	4.41612e+06	5.30726e+06
222	1	4.41612e+06	5.30726e+06
223	3	4.41576e+06	5.30685e+06
224	3	4.41576e+06	5.30685e+06
225	3	4.41532e+06	5.30635e+06
226	2	4.41507e+06	5.30606e+06
227	1	4.41507e+06	5.30606e+06
228	9	4.41504e+06	5.30602e+06
229	6	4.41487e+06	5.30577e+06
230	2	4.41487e+06	5.30577e+06
231	4	4.41484e+06	5.30569e+06
232	6	4.41479e+06	5.30548e+06
233	2	4.41457e+06	5.30465e+06
234	5	4.41449e+06	5.30451e+06
235	3	4.41441e+06	5.3044e+06
236	1	4.41441e+06	5.3044e+06
237	4	4.41441e+06	5.3044e+06
238	3	4.41432e+06	5.30425e+06
239	1	4.41408e+06	5.30386e+06
240	2	4.41408e+06	5.30386e+06
241	6	4.42239e+06	5.30994e+06
242	4	4.42239e+06	5.30994e+06
243	6	4.42239e+06	5.30994e+06
244	14	4.4226e+06	5.30988e+06
245	6	4.42292e+06	5.30979e+06
246	28	4.42292e+06	5.30979e+06
247	3	4.42339e+06	5.30966e+06
248	4	4.42367e+06	5.30959e+06
249	4	4.42391e+06	5.30952e+06
250	13	4.42391e+06	5.30952e+06
251	6	4.42413e+06	5.30946e+06
252	7	4.42413e+06	5.30946e+06
253	1	4.42458e+06	5.30934e+06
254	10	4.42458e+06	5.30934e+06
255	4	4.42467e+06	5.30931e+06
256	1	4.42467e+06	5.30931e+06
257	2	4.42512e+06	5.30919e+06
258	1	4.42564e+06	5.30905e+06
259	7	4.42609e+06	5.30893e+06
260	5	4.42637e+06	5.30885e+06
261	1	4.42637e+06	5.30885e+06
262	1	4.42637e+06	5.30885e+06
263	7	4.4264e+06	5.30884e+06
264	3	4.42668e+06	5.30876e+06
265	6	4.42691e+06	5.30871e+06
266	11	4.42691e+06	5.30871e+06
267	6	4.42734e+06	5.30859e+06
268	7	4.42727e+06	5.30861e+06
269	4	4.42734e+06	5.30859e+06
270	9	4.42792e+06	5.30843e+06
271	5	4.42813e+06	5.30837e+06
272	9	4.42856e+06	5.30823e+06
273	8	4.42886e+06	5.30812e+06
274	5	4.42886e+06	5.30812e+06
275	4	4.43632e+06	5.31544e+06
276	8	4.43632e+06	5.31544e+06
277	1	4.43632e+06	5.31544e+06
278	4	4.43632e+06	5.31544e+06
279	6	4.43632e+06	5.31544e+06
280	18	4.43586e+06	5.3155e+06
281	9	4.43586e+06	5.3155e+06
282	2	4.43586e+06	5.3155e+06
283	18	4.43586e+06	5.3155e+06
284	6	4.43524e+06	5.31559e+06
285	16	4.43524e+06	5.31559e+06
286	14	4.43501e+06	5.31563e+06
287	3	4.43501e+06	5.31563e+06
288	2	4.43482e+06	5.31566e+06
289	45	4.4343e+06	5.31576e+06
290	4	4.43438e+06	5.31574e+06
291	4	4.43418e+06	5.31578e+06
292	11	4.43376e+06	5.31586e+06
293	3	4.43376e+06	5.31586e+06
294	7	4.43363e+06	5.31588e+06
295	2	4.43363e+06	5.31588e+06
296	2	4.43363e+06	5.31588e+06
297	4	4.4335e+06	5.31591e+06
298	3	4.4335e+06	5.31591e+06
299	5	4.4335e+06	5.31591e+06
300	3	4.4335e+06	5.31591e+06
301	6	4.43317e+06	5.31597e+06
302	1	4.43317e+06	5.31597e+06
303	13	4.43294e+06	5.31604e+06
304	14	4.43277e+06	5.31609e+06
305	7	4.43277e+06	5.31609e+06
306	8	4.43231e+06	5.31623e+06
307	16	4.43231e+06	5.31623e+06
308	17	4.43231e+06	5.31623e+06
309	5	4.43205e+06	5.31632e+06
310	4	4.43205e+06	5.31632e+06
311	22	4.43168e+06	5.31647e+06
312	16	4.43168e+06	5.31647e+06
313	4	4.43168e+06	5.31647e+06
314	2	4.43153e+06	5.31653e+06
315	4	4.43153e+06	5.31653e+06
316	8	4.43137e+06	5.3166e+06
317	20	4.43125e+06	5.31665e+06
318	4	4.43125e+06	5.31665e+06
319	3	4.43125e+06	5.31665e+06
320	7	4.43075e+06	5.31685e+06
321	8	4.43075e+06	5.31685e+06
322	23	4.43062e+06	5.3169e+06
323	25	4.43049e+06	5.31696e+06
324	30	4.42888e+06	5.31695e+06
325	7	4.42867e+06	5.31682e+06
326	8	4.42844e+06	5.31668e+06
327	1	4.42844e+06	5.31668e+06
328	13	4.428e+06	5.31641e+06
329	4	4.42758e+06	5.31615e+06
330	9	4.42744e+06	5.31606e+06
331	3	4.42742e+06	5.31605e+06
332	8	4.42736e+06	5.31601e+06
333	1	4.42735e+06	5.316e+06
334	4	4.427e+06	5.31571e+06
335	7	4.427e+06	5.31571e+06
336	2	4.42674e+06	5.31539e+06
337	3	4.42656e+06	5.31518e+06
338	1	4.42656e+06	5.31518e+06
339	5	4.42656e+06	5.31518e+06
340	3	4.42636e+06	5.31496e+06
341	1	4.42616e+06	5.31472e+06
342	5	4.42586e+06	5.31437e+06
343	3	4.42586e+06	5.31437e+06
344	40	4.42561e+06	5.31407e+06
345	5	4.42561e+06	5.31407e+06
346	6	4.4257e+06	5.31418e+06
347	1	4.4257e+06	5.31418e+06
348	6	4.4257e+06	5.31418e+06
349	3	4.42544e+06	5.31387e+06
350	9	4.42523e+06	5.31363e+06
351	30	4.42503e+06	5.31339e+06
352	3	4.42503e+06	5.31339e+06
353	3	4.42492e+06	5.31327e+06
354	8	4.42437e+06	5.31263e+06
355	25	4.42437e+06	5.31263e+06
356	7	4.42429e+06	5.31254e+06
357	9	4.42415e+06	5.31238e+06
358	12	4.42414e+06	5.31236e+06
359	36	4.42257e+06	5.31099e+06
360	3	4.40542e+06	5.28209e+06
361	2	4.42205e+06	5.26851e+06
362	2	4.42214e+06	5.26821e+06
363	2	4.41952e+06	5.26065e+06
364	5	4.42299e+06	5.25971e+06
365	6	4.42299e+06	5.25971e+06
366	5	4.42479e+06	5.25891e+06
367	1	4.42479e+06	5.25891e+06
368	1	4.42479e+06	5.25891e+06
369	4	4.42685e+06	5.26932e+06
370	1	4.42661e+06	5.26973e+06
371	11	4.42894e+06	5.26728e+06
372	1	4.42894e+06	5.26728e+06
373	6	4.42902e+06	5.26713e+06
374	14	4.42936e+06	5.26685e+06
375	5	4.42936e+06	5.26685e+06
376	1	4.42975e+06	5.26684e+06
377	5	4.42975e+06	5.26684e+06
378	1	4.43051e+06	5.26665e+06
379	3	4.43101e+06	5.26584e+06
380	2	4.42962e+06	5.27563e+06
381	3	4.4329e+06	5.27543e+06
382	2	4.43789e+06	5.27414e+06
383	4	4.43927e+06	5.2746e+06
384	2	4.44467e+06	5.28147e+06
385	1	4.44398e+06	5.28148e+06
386	3	4.44101e+06	5.28048e+06
387	7	4.4387e+06	5.27938e+06
388	21	4.43737e+06	5.27885e+06
389	35	4.43662e+06	5.27854e+06
390	5	4.43636e+06	5.27843e+06
391	1	4.4357e+06	5.27816e+06
392	2	4.4357e+06	5.27816e+06
393	11	4.43444e+06	5.27787e+06
394	1	4.42695e+06	5.28006e+06
395	6	4.42574e+06	5.28355e+06
396	10	4.42631e+06	5.28478e+06
397	2	4.42653e+06	5.28717e+06
398	4	4.42653e+06	5.28717e+06
399	3	4.42397e+06	5.29108e+06
400	1	4.42368e+06	5.29164e+06
401	13	4.42327e+06	5.29247e+06
402	1	4.42311e+06	5.29287e+06
403	4	4.42308e+06	5.29291e+06
404	11	4.42213e+06	5.29423e+06
405	8	4.4218e+06	5.29485e+06
406	8	4.42111e+06	5.29614e+06
407	9	4.42111e+06	5.29614e+06
408	11	4.42066e+06	5.29704e+06
409	9	4.42079e+06	5.29656e+06
410	6	4.41948e+06	5.29823e+06
411	10	4.41922e+06	5.29843e+06
412	5	4.41895e+06	5.29864e+06
413	10	4.41922e+06	5.29843e+06
414	5	4.41859e+06	5.29891e+06
415	2	4.41835e+06	5.29909e+06
416	14	4.41691e+06	5.30046e+06
417	1	4.41567e+06	5.30082e+06
418	2	4.41484e+06	5.30102e+06
419	1	4.41358e+06	5.30109e+06
420	1	4.41307e+06	5.30112e+06
421	2	4.41307e+06	5.30112e+06
422	4	4.41302e+06	5.30112e+06
423	2	4.41285e+06	5.30112e+06
424	6	4.41272e+06	5.30113e+06
425	4	4.41243e+06	5.30114e+06
426	3	4.41243e+06	5.30114e+06
427	1	4.41176e+06	5.30097e+06
428	6	4.43415e+06	5.26345e+06
429	7	4.4306e+06	5.2625e+06
430	11	4.42979e+06	5.26145e+06
431	3	4.42979e+06	5.26145e+06
432	7	4.42984e+06	5.26151e+06
433	11	4.42913e+06	5.26059e+06
434	3	4.42868e+06	5.26001e+06
435	3	4.42849e+06	5.25976e+06
436	2	4.40154e+06	5.28358e+06
437	5	4.4005e+06	5.28394e+06
438	7	4.40105e+06	5.28375e+06
439	3	4.40153e+06	5.28359e+06
440	3	4.40009e+06	5.28408e+06
441	1	4.39945e+06	5.28665e+06
442	2	4.39945e+06	5.28665e+06
443	1	4.39806e+06	5.28717e+06
444	12	4.39771e+06	5.28738e+06
445	3	4.39691e+06	5.2879e+06
446	9	4.39634e+06	5.28827e+06
447	2	4.39573e+06	5.28889e+06
448	14	4.39486e+06	5.29076e+06
449	1	4.39435e+06	5.29161e+06
450	2	4.39427e+06	5.29173e+06
451	2	4.39417e+06	5.2919e+06
452	1	4.3939e+06	5.29234e+06
453	3	4.3939e+06	5.29234e+06
454	2	4.39372e+06	5.29265e+06
455	2	4.39358e+06	5.29288e+06
456	3	4.39334e+06	5.29327e+06
457	4	4.39315e+06	5.29356e+06
458	2	4.39265e+06	5.2938e+06
459	10	4.39181e+06	5.2943e+06
460	10	4.39054e+06	5.29526e+06
461	5	4.39003e+06	5.29551e+06
462	4	4.38949e+06	5.29577e+06
463	2	4.38854e+06	5.29626e+06
464	1	4.38837e+06	5.29642e+06
465	17	4.38811e+06	5.29668e+06
466	2	4.38792e+06	5.29686e+06
467	3	4.38708e+06	5.29741e+06
468	1	4.38658e+06	5.29746e+06
469	1	4.38658e+06	5.29746e+06
470	4	4.38626e+06	5.2975e+06
471	6	4.38566e+06	5.29748e+06
472	2	4.38526e+06	5.29742e+06
473	56	4.38491e+06	5.29737e+06
474	9	4.38491e+06	5.29737e+06
475	1	4.38448e+06	5.2973e+06
476	4	4.38427e+06	5.29727e+06
477	3	4.38274e+06	5.29728e+06
478	1	4.38157e+06	5.29735e+06
479	9	4.38036e+06	5.29743e+06
480	9	4.38036e+06	5.29743e+06
481	16	4.37977e+06	5.29748e+06
482	1	4.37967e+06	5.29748e+06
483	1	4.40315e+06	5.26905e+06
484	4	4.40327e+06	5.26888e+06
485	11	4.40326e+06	5.26866e+06
486	10	4.40338e+06	5.26827e+06
487	4	4.40346e+06	5.26802e+06
488	3	4.40346e+06	5.26802e+06
489	6	4.40356e+06	5.26785e+06
490	4	4.40353e+06	5.26764e+06
491	1	4.40349e+06	5.26737e+06
492	3	4.40349e+06	5.26737e+06
493	14	4.40339e+06	5.26714e+06
494	1	4.40331e+06	5.26699e+06
495	3	4.40338e+06	5.26676e+06
496	1	4.40346e+06	5.26253e+06
497	4	4.4035e+06	5.26224e+06
498	8	4.4035e+06	5.26224e+06
499	7	4.40502e+06	5.26099e+06
500	7	4.40503e+06	5.26084e+06
501	4	4.40936e+06	5.26175e+06
502	7	4.40944e+06	5.26182e+06
503	8	4.40377e+06	5.29009e+06
504	8	4.40377e+06	5.29009e+06
505	9	4.40377e+06	5.29009e+06
506	2	4.4041e+06	5.29075e+06
507	5	4.4041e+06	5.29075e+06
508	17	4.40438e+06	5.29131e+06
509	2	4.40438e+06	5.29131e+06
510	2	4.40491e+06	5.2924e+06
511	7	4.40526e+06	5.2931e+06
512	6	4.40526e+06	5.2931e+06
513	7	4.4078e+06	5.29705e+06
514	14	4.41541e+06	5.33029e+06
515	4	4.41576e+06	5.33063e+06
516	1	4.41576e+06	5.33063e+06
517	8	4.41599e+06	5.33085e+06
518	9	4.41816e+06	5.33174e+06
519	13	4.42334e+06	5.33418e+06
520	5	4.42334e+06	5.33418e+06
521	8	4.42334e+06	5.33418e+06
522	4	4.42558e+06	5.33736e+06
523	4	4.42536e+06	5.33798e+06
524	1	4.42722e+06	5.3337e+06
525	1	4.42722e+06	5.3337e+06
526	12	4.42722e+06	5.33355e+06
527	1	4.42723e+06	5.33327e+06
528	30	4.43498e+06	5.32213e+06
529	2	4.43564e+06	5.32161e+06
530	4	4.43564e+06	5.32161e+06
531	7	4.43614e+06	5.3212e+06
532	7	4.43614e+06	5.3212e+06
533	7	4.43626e+06	5.32111e+06
534	5	4.43704e+06	5.32043e+06
535	1	4.43923e+06	5.32008e+06
536	3	4.44032e+06	5.31998e+06
537	1	4.44159e+06	5.31986e+06
538	12	4.44212e+06	5.31983e+06
539	1	4.4425e+06	5.3198e+06
540	5	4.42677e+06	5.32438e+06
541	6	4.42662e+06	5.32445e+06
542	1	4.42632e+06	5.32461e+06
543	5	4.42632e+06	5.32461e+06
544	5	4.42587e+06	5.32486e+06
545	4	4.42573e+06	5.32494e+06
546	1	4.42538e+06	5.32515e+06
547	2	4.42495e+06	5.32538e+06
548	6	4.42397e+06	5.32585e+06
549	4	4.42357e+06	5.32605e+06
550	3	4.42329e+06	5.32621e+06
551	1	4.42288e+06	5.32645e+06
552	3	4.41097e+06	5.32646e+06
553	1	4.41466e+06	5.32569e+06
554	4	4.41507e+06	5.32572e+06
555	12	4.41507e+06	5.32572e+06
556	2	4.41525e+06	5.32574e+06
557	5	4.4164e+06	5.32595e+06
558	12	4.41708e+06	5.32608e+06
559	9	4.41708e+06	5.32608e+06
560	6	4.41848e+06	5.3263e+06
561	1	4.41913e+06	5.32637e+06
562	14	4.4285e+06	5.32759e+06
563	9	4.42867e+06	5.32797e+06
564	5	4.42867e+06	5.32797e+06
565	7	4.42886e+06	5.32839e+06
566	6	4.42904e+06	5.3288e+06
567	19	4.42911e+06	5.32896e+06
568	11	4.42925e+06	5.3293e+06
569	2	4.42925e+06	5.3293e+06
570	13	4.42933e+06	5.32946e+06
571	1	4.42947e+06	5.32979e+06
572	4	4.42982e+06	5.33058e+06
573	6	4.42994e+06	5.33085e+06
574	7	4.43013e+06	5.33119e+06
575	4	4.43013e+06	5.33119e+06
576	3	4.43021e+06	5.33135e+06
577	6	4.43021e+06	5.33135e+06
578	7	4.43033e+06	5.33155e+06
579	20	4.43043e+06	5.33172e+06
580	8	4.43043e+06	5.33172e+06
581	13	4.43043e+06	5.33172e+06
582	30	4.43058e+06	5.33198e+06
583	2	4.43094e+06	5.33246e+06
584	7	4.43119e+06	5.33278e+06
585	1	4.43128e+06	5.33291e+06
586	2	4.43169e+06	5.33362e+06
587	5	4.43183e+06	5.33386e+06
588	9	4.4322e+06	5.33448e+06
589	7	4.4322e+06	5.33448e+06
590	10	4.43236e+06	5.33476e+06
591	6	4.43326e+06	5.33632e+06
592	4	4.43362e+06	5.33694e+06
593	7	4.43362e+06	5.33694e+06
594	1	4.43362e+06	5.33694e+06
595	1	4.43374e+06	5.33714e+06
596	6	4.43383e+06	5.33729e+06
597	1	4.43427e+06	5.33785e+06
598	8	4.43435e+06	5.33795e+06
599	7	4.43516e+06	5.33889e+06
600	8	4.43516e+06	5.33889e+06
601	5	4.43582e+06	5.3397e+06
602	22	4.43661e+06	5.34063e+06
603	16	4.43677e+06	5.34079e+06
604	13	4.41085e+06	5.30013e+06
605	16	4.41079e+06	5.30007e+06
606	1	4.41023e+06	5.29657e+06
607	5	4.41059e+06	5.29619e+06
608	4	4.41034e+06	5.29539e+06
609	4	4.41081e+06	5.29485e+06
610	30	4.41097e+06	5.29453e+06
611	8	4.4115e+06	5.2938e+06
612	6	4.41165e+06	5.29359e+06
613	23	4.41171e+06	5.29349e+06
614	3	4.41195e+06	5.29323e+06
615	5	4.41213e+06	5.29302e+06
616	1	4.41229e+06	5.29293e+06
617	10	4.41229e+06	5.29293e+06
618	6	4.41262e+06	5.29274e+06
619	10	4.41262e+06	5.29274e+06
620	46	4.4127e+06	5.29259e+06
621	12	4.41272e+06	5.29234e+06
622	3	4.4127e+06	5.29267e+06
623	9	4.41278e+06	5.29225e+06
624	3	4.41285e+06	5.29219e+06
625	1	4.41285e+06	5.29219e+06
626	6	4.41304e+06	5.29202e+06
627	1	4.41304e+06	5.29202e+06
628	1	4.41327e+06	5.2919e+06
629	8	4.41335e+06	5.29164e+06
630	4	4.41335e+06	5.29164e+06
631	7	4.41335e+06	5.29164e+06
632	6	4.41351e+06	5.29148e+06
633	3	4.4132e+06	5.29025e+06
634	2	4.41312e+06	5.29002e+06
635	7	4.41308e+06	5.28983e+06
636	13	4.41308e+06	5.28983e+06
637	15	4.41305e+06	5.28967e+06
638	6	4.41305e+06	5.28967e+06
639	69	4.41293e+06	5.28925e+06
640	21	4.41293e+06	5.28925e+06
641	24	4.41285e+06	5.28897e+06
642	9	4.41279e+06	5.28867e+06
643	13	4.41276e+06	5.28856e+06
644	6	4.41276e+06	5.28856e+06
645	5	4.41274e+06	5.28853e+06
646	8	4.41274e+06	5.28819e+06
647	4	4.41274e+06	5.28744e+06
648	33	4.41275e+06	5.28723e+06
649	9	4.41275e+06	5.28682e+06
650	7	4.41264e+06	5.28635e+06
651	3	4.41259e+06	5.28626e+06
652	6	4.41255e+06	5.28614e+06
653	3	4.41251e+06	5.28593e+06
654	5	4.41251e+06	5.28593e+06
655	2	4.41245e+06	5.2857e+06
656	3	4.41071e+06	5.28518e+06
657	12	4.4104e+06	5.2853e+06
658	4	4.4104e+06	5.2853e+06
659	7	4.40961e+06	5.28563e+06
660	6	4.40961e+06	5.28563e+06
661	5	4.40832e+06	5.28582e+06
662	10	4.40799e+06	5.28585e+06
663	3	4.40788e+06	5.28586e+06
664	4	4.40781e+06	5.28586e+06
665	4	4.40702e+06	5.28593e+06
666	3	4.4066e+06	5.28597e+06
667	10	4.40643e+06	5.28598e+06
668	61	4.40603e+06	5.28602e+06
669	8	4.43084e+06	5.3074e+06
670	4	4.43103e+06	5.30729e+06
671	2	4.43147e+06	5.30704e+06
672	1	4.4316e+06	5.30697e+06
673	1	4.43183e+06	5.30684e+06
674	6	4.43183e+06	5.30684e+06
675	4	4.43201e+06	5.30674e+06
676	1	4.43201e+06	5.30674e+06
677	8	4.43201e+06	5.30674e+06
678	11	4.43216e+06	5.30666e+06
679	29	4.4324e+06	5.30652e+06
680	5	4.4328e+06	5.3063e+06
681	3	4.4329e+06	5.30625e+06
682	20	4.43335e+06	5.306e+06
683	5	4.43351e+06	5.30591e+06
684	8	4.43366e+06	5.30582e+06
685	1	4.43478e+06	5.3052e+06
686	2	4.43495e+06	5.30511e+06
687	4	4.43518e+06	5.30498e+06
688	2	4.43518e+06	5.30498e+06
689	1	4.43537e+06	5.3049e+06
690	2	4.43537e+06	5.3049e+06
691	3	4.43563e+06	5.3048e+06
692	4	4.43604e+06	5.30464e+06
693	3	4.43634e+06	5.30452e+06
694	5	4.43696e+06	5.30427e+06
695	7	4.43696e+06	5.30427e+06
696	9	4.43713e+06	5.30421e+06
697	3	4.43756e+06	5.30404e+06
698	4	4.44092e+06	5.30288e+06
699	2	4.44317e+06	5.30289e+06
700	1	4.44362e+06	5.3029e+06
701	3	4.44483e+06	5.30303e+06
702	2	4.44526e+06	5.3031e+06
703	34	4.4455e+06	5.30314e+06
704	6	4.44524e+06	5.31231e+06
705	4	4.44506e+06	5.3123e+06
706	2	4.44305e+06	5.3122e+06
707	43	4.44232e+06	5.31221e+06
708	5	4.4421e+06	5.31231e+06
709	10	4.44185e+06	5.31247e+06
710	2	4.44185e+06	5.31247e+06
711	1	4.44169e+06	5.31254e+06
712	1	4.44013e+06	5.31334e+06
713	4	4.43909e+06	5.31446e+06
714	1	4.43177e+06	5.30518e+06
715	8	4.43174e+06	5.30475e+06
716	9	4.43174e+06	5.30475e+06
717	3	4.4317e+06	5.30428e+06
718	12	4.4317e+06	5.30428e+06
719	11	4.43167e+06	5.30394e+06
720	4	4.43167e+06	5.30394e+06
721	5	4.43163e+06	5.30368e+06
722	2	4.43155e+06	5.30328e+06
723	11	4.43148e+06	5.30289e+06
724	11	4.43139e+06	5.30241e+06
725	7	4.43148e+06	5.30213e+06
726	12	4.43163e+06	5.30172e+06
727	7	4.43173e+06	5.30146e+06
728	68	4.43195e+06	5.3009e+06
729	5	4.43191e+06	5.301e+06
730	1	4.43191e+06	5.301e+06
731	2	4.43191e+06	5.301e+06
732	11	4.43195e+06	5.3009e+06
733	2	4.43207e+06	5.3006e+06
734	9	4.43211e+06	5.30048e+06
735	10	4.43195e+06	5.3009e+06
736	3	4.43224e+06	5.30007e+06
737	3	4.43226e+06	5.29963e+06
738	1	4.43224e+06	5.29918e+06
739	11	4.43217e+06	5.29903e+06
740	1	4.43217e+06	5.29903e+06
741	2	4.43205e+06	5.29874e+06
742	2	4.43184e+06	5.29824e+06
743	4	4.43162e+06	5.29654e+06
744	1	4.43235e+06	5.29522e+06
745	34	4.40937e+06	5.2934e+06
746	37	4.40891e+06	5.29331e+06
747	39	4.40872e+06	5.29327e+06
748	6	4.40855e+06	5.29323e+06
749	3	4.40855e+06	5.29323e+06
750	1	4.40855e+06	5.29323e+06
751	4	4.40819e+06	5.29316e+06
752	1	4.40819e+06	5.29316e+06
753	5	4.40812e+06	5.29315e+06
754	6	4.40812e+06	5.29315e+06
755	7	4.40812e+06	5.29315e+06
756	6	4.40805e+06	5.29313e+06
757	5	4.40805e+06	5.29313e+06
758	2	4.40805e+06	5.29313e+06
759	1	4.40805e+06	5.29313e+06
760	4	4.40791e+06	5.29314e+06
761	5	4.40791e+06	5.29314e+06
762	4	4.40791e+06	5.29314e+06
763	1	4.40791e+06	5.29314e+06
764	1	4.40791e+06	5.29314e+06
765	4	4.41377e+06	5.29352e+06
766	15	4.41431e+06	5.29335e+06
767	4	4.41446e+06	5.29342e+06
768	5	4.41479e+06	5.29351e+06
769	6	4.41496e+06	5.29351e+06
770	8	4.41496e+06	5.29351e+06
771	3	4.41496e+06	5.29351e+06
772	6	4.41523e+06	5.29349e+06
773	1	4.41547e+06	5.29345e+06
774	3	4.41547e+06	5.29345e+06
775	2	4.41562e+06	5.29338e+06
776	2	4.41576e+06	5.29342e+06
777	2	4.41576e+06	5.29342e+06
778	6	4.416e+06	5.2935e+06
779	2	4.416e+06	5.2935e+06
780	8	4.416e+06	5.2935e+06
781	6	4.4162e+06	5.29351e+06
782	2	4.41629e+06	5.29351e+06
783	8	4.41629e+06	5.29351e+06
784	6	4.4166e+06	5.29351e+06
785	3	4.4166e+06	5.29351e+06
786	9	4.41695e+06	5.2935e+06
787	20	4.41695e+06	5.2935e+06
788	10	4.41727e+06	5.29349e+06
789	4	4.41727e+06	5.29349e+06
790	4	4.41738e+06	5.29351e+06
791	1	4.41738e+06	5.29351e+06
792	3	4.41738e+06	5.29351e+06
793	7	4.41751e+06	5.2935e+06
794	1	4.41751e+06	5.2935e+06
795	6	4.41804e+06	5.29352e+06
796	9	4.41823e+06	5.29351e+06
797	20	4.41823e+06	5.29351e+06
798	1	4.41823e+06	5.29351e+06
799	1	4.41823e+06	5.29351e+06
800	1	4.41823e+06	5.29351e+06
801	6	4.41847e+06	5.29352e+06
802	2	4.41908e+06	5.29356e+06
